# Supplementary material for: A Multi-Hemagglutinin-Based Enzyme-Linked Immunosorbent Assay to Serologically Detect Influenza A Virus Infection in Animals
Source: MDPI journal article supplement (doi:10.3390/vetsci6030064), 2019-07-22
Supplement: s1 [file s1]

Supplementary Information

**A multi-hemagglutinin-based enzyme-linked immunosorbent assay to  
serologically detect influenza A virus infection in animals**

Miki Okumura, Akiko Takenaka-Uema, Shin Murakami and Taisuke  
Horimoto

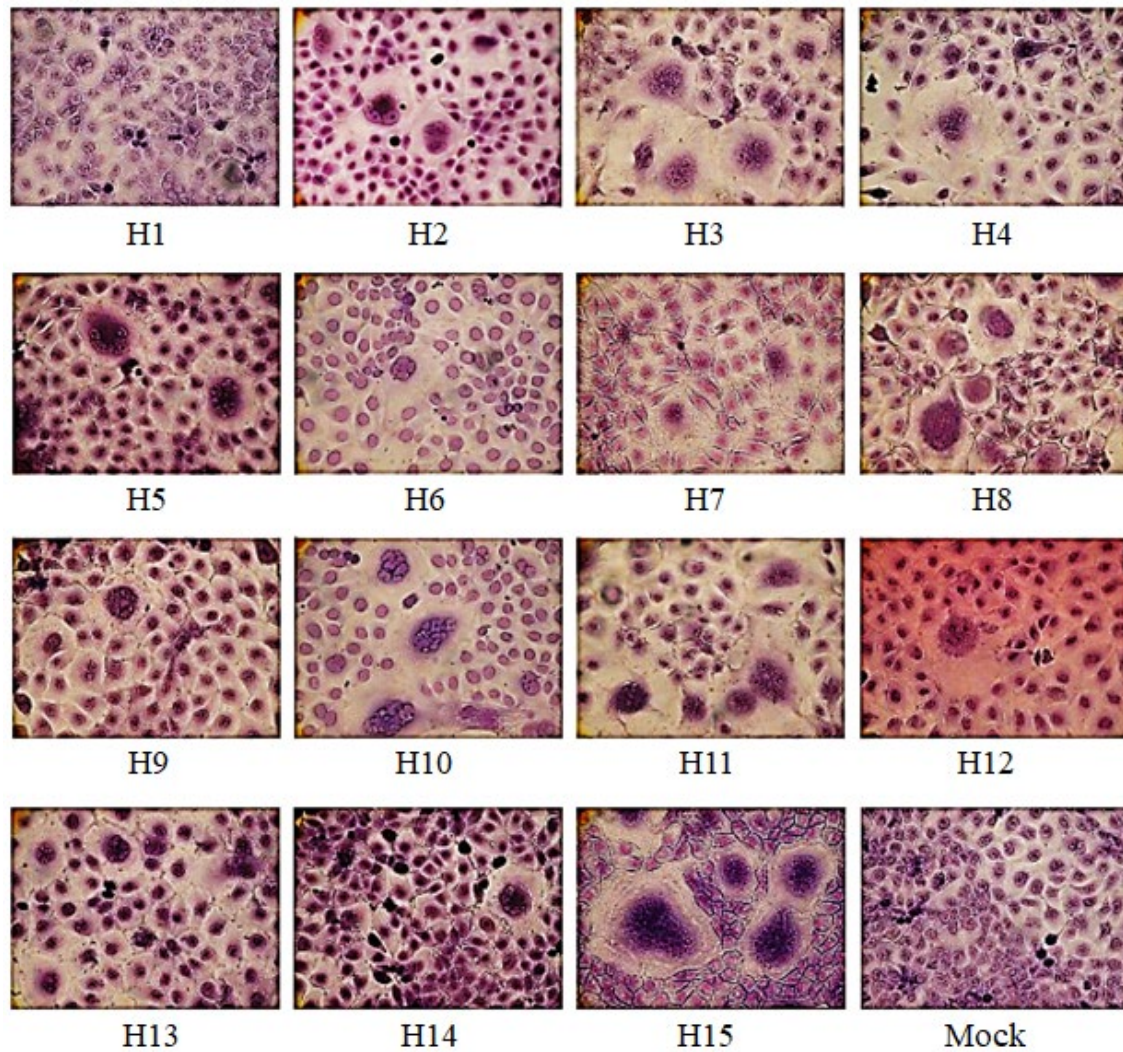

**Fig. S1.** HA expression in the transfected MDCK cells. Expression of each subtype HA was confirmed by a fusion assay in which syncytium was observed on cell culture via Giemsa staining.
